# Supplementary material for: Increased Iron Levels and Oxidative Stress Mediate Age-Related Impairments in Male and Female Drosophila melanogaster
Source: Hindawi journal article supplement (doi:10.1155/2023/7222462), 2023-06-09
Supplement: f1 [file 7222462.f1.pdf]

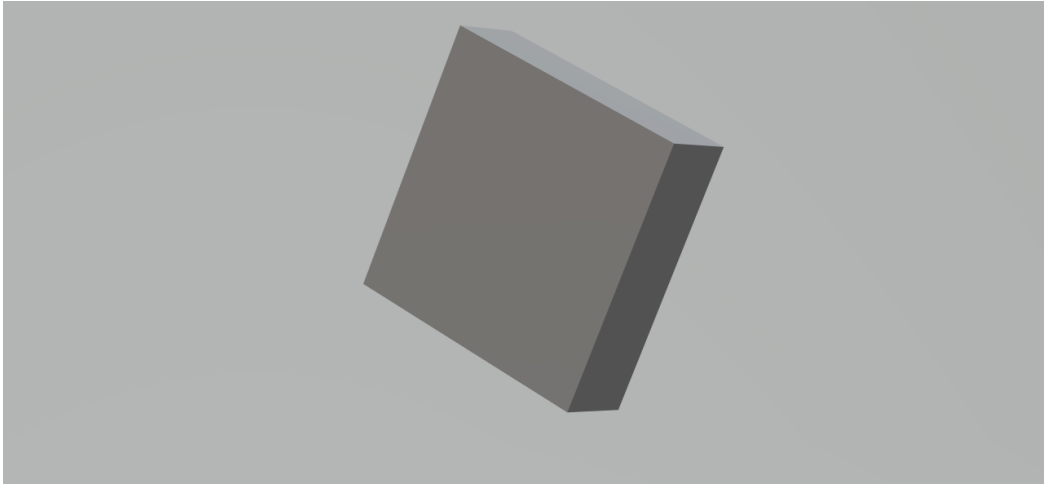

Supplementary material I
